# Supplementary material for: Antioxidant and Anticancer Activities of Synthesized Methylated and Acetylated Derivatives of Natural Bromophenols
Source: MDPI journal article supplement (doi:10.3390/antiox11040786), 2022-04-15
Supplement: s1 [file s1]

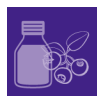

# Antioxidant and anticancer activities of synthesized methylated and acetylated derivatives of natural bromophenols

Hui Dong <sup>1,2, #</sup>, Li Wang <sup>1, #</sup>, Meng Guo <sup>1,2</sup>, Dimitrios Stagos <sup>3</sup>, Antonis Giakountis <sup>3</sup>, Varvara Trachana <sup>4</sup>, Xiukun Lin <sup>5</sup>, Yankai Liu <sup>1,2, \*</sup> and Ming Lriu <sup>1,2, \*</sup>

The <sup>1</sup>H NMR, <sup>13</sup>C NMR, HRMS and HPLC Spectrum of Compound **3b-1** to **9** and **4b-1** to **6**

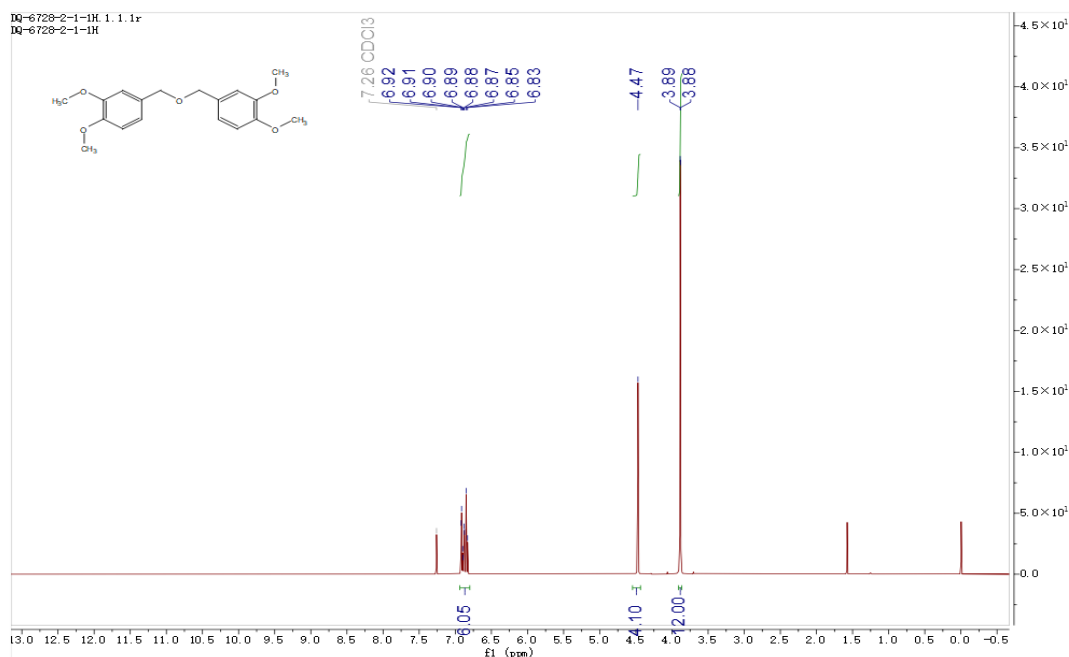

Figure S1. <sup>1</sup>H NMR spectrum of compound **3b-1** in Chloroform-*d* (400 MHz).

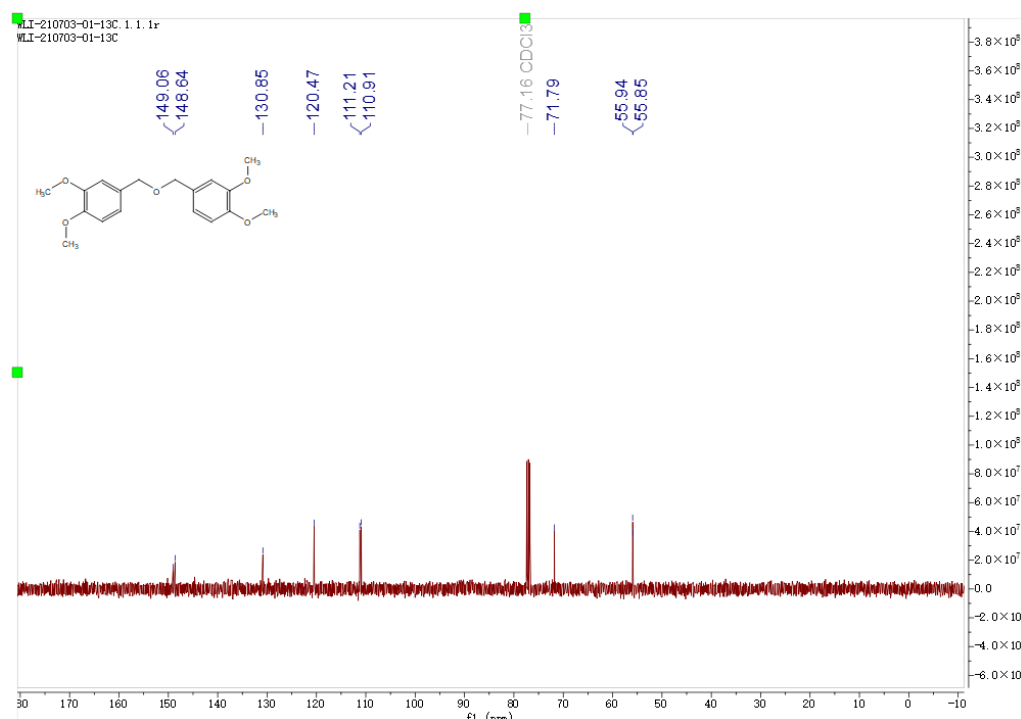

Figure S2. <sup>13</sup>C NMR spectrum of compound **3b-1** in Chloroform-*d* (101 MHz).

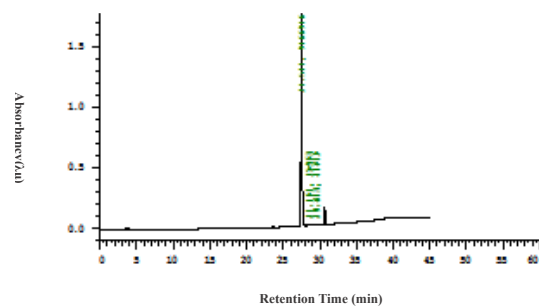

| No. | RT     | Area    | Concentration | BC |
|-----|--------|---------|---------------|----|
| 1   | 27.500 | 9466946 | 98.917        | BV |
| 2   | 28.460 | 45963   | 0.480         | VV |
| 3   | 28.740 | 22543   | 0.236         | VB |
| 4   | 29.313 | 20306   | 0.212         | BV |
| 5   | 29.673 | 14842   | 0.155         | VB |
|     |        | 9570600 | 100.000       |    |

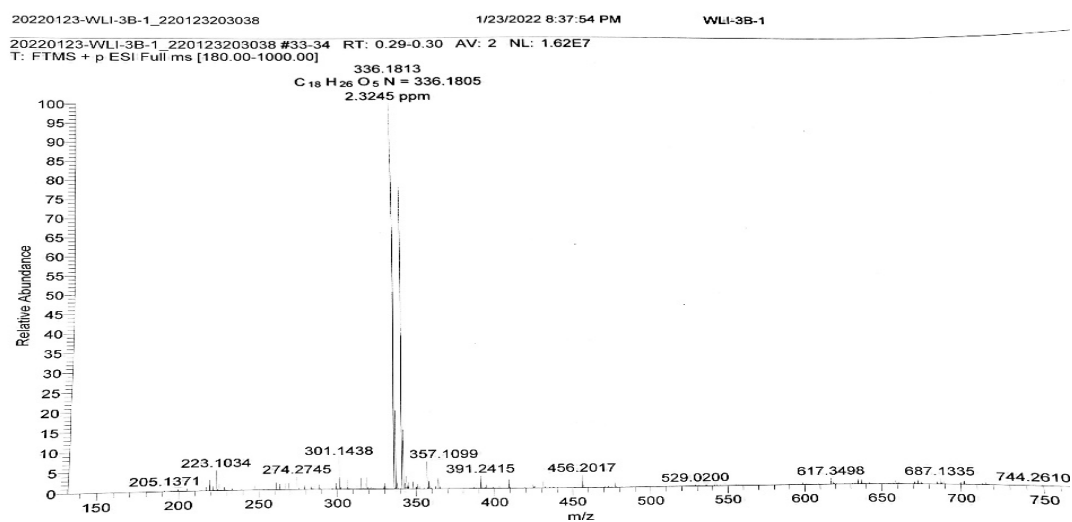

Figure S3. HRMS and HPLC Spectra of **3b-1**.

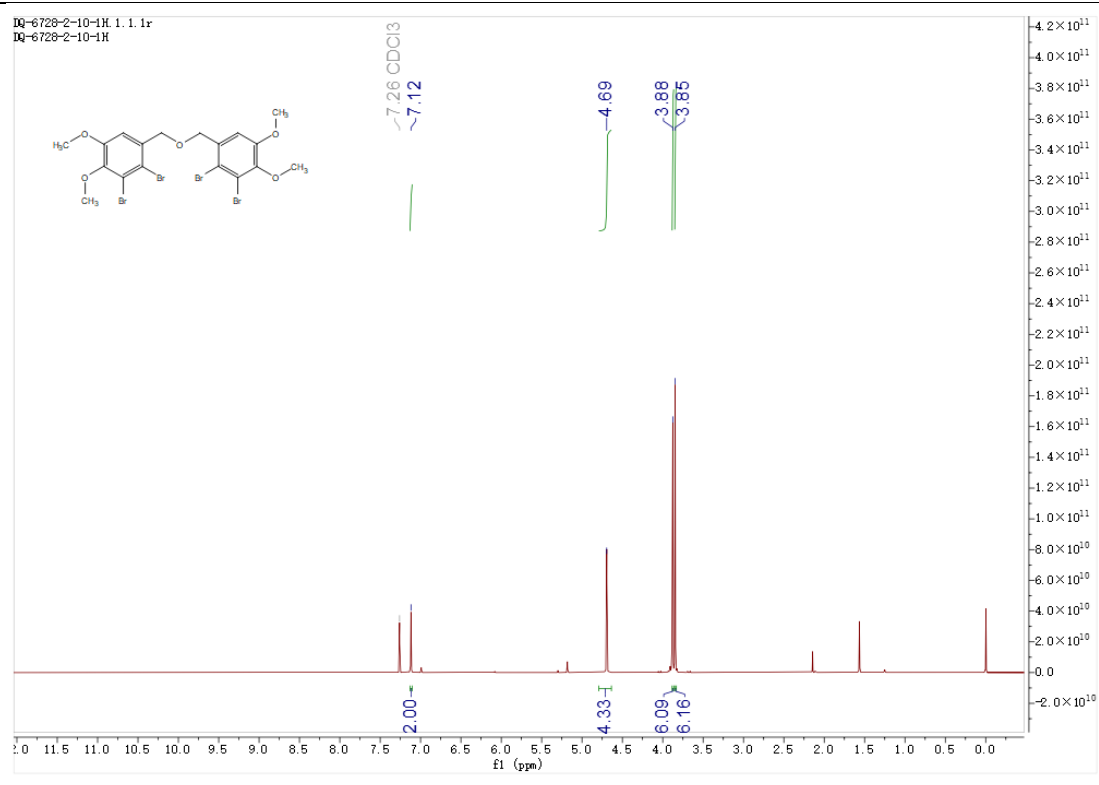

Figure S4.  $^1\text{H}$  NMR spectrum of compound 3b-2 in Chloroform-*d* (400 MHz).

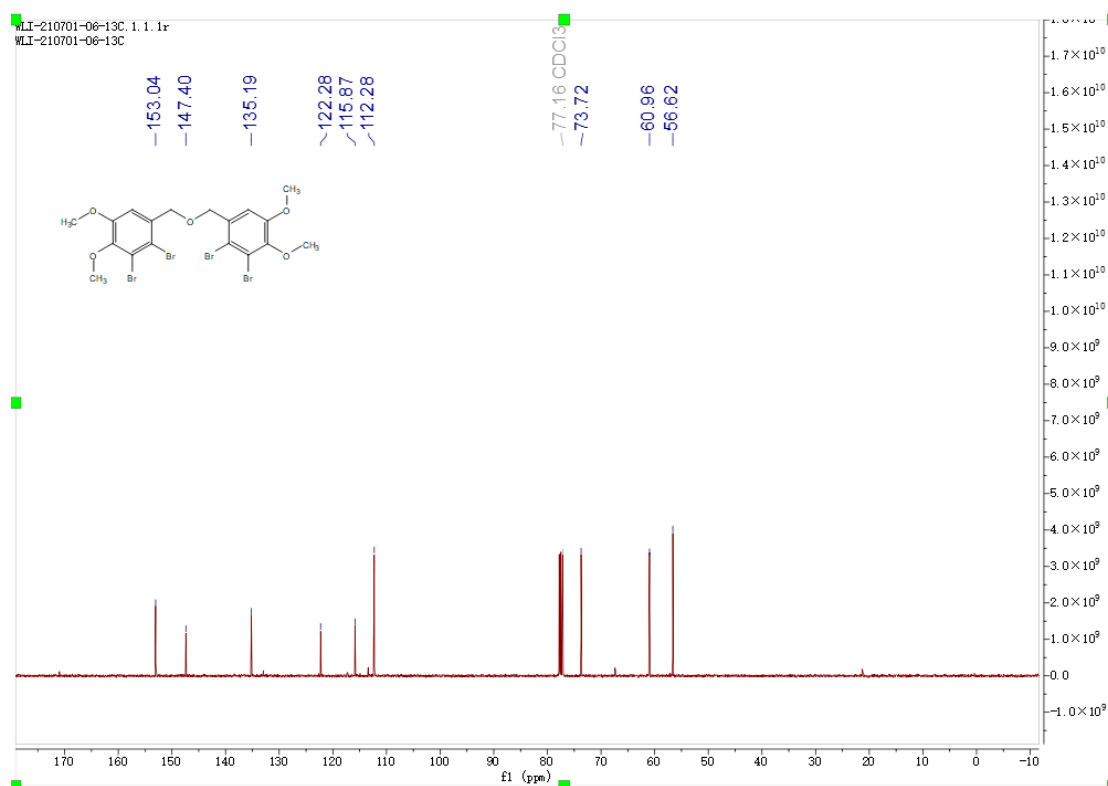

Figure S5.  $^{13}\text{C}$  NMR spectrum of compound 3b-2 in Chloroform-*d* (101 MHz).

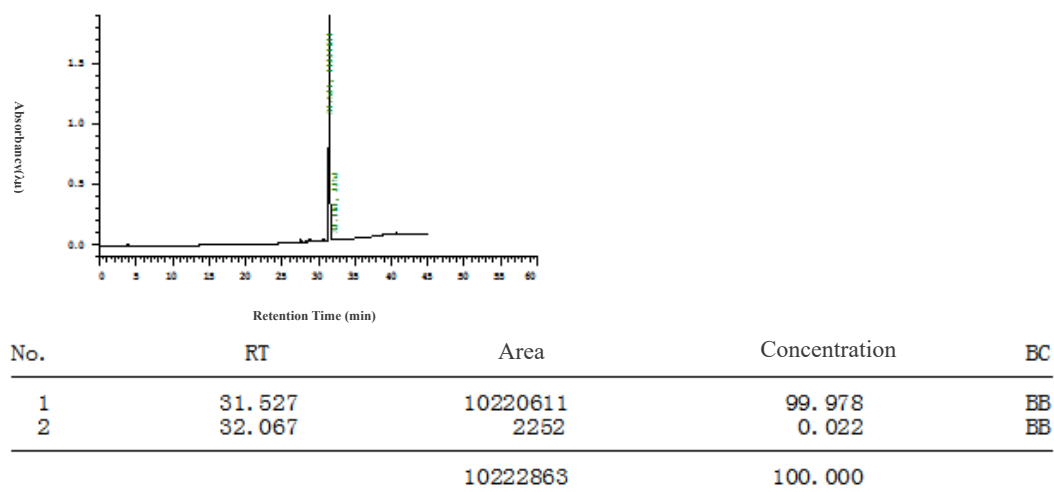

Figure S6. HPLC Spectra of 3b-2.

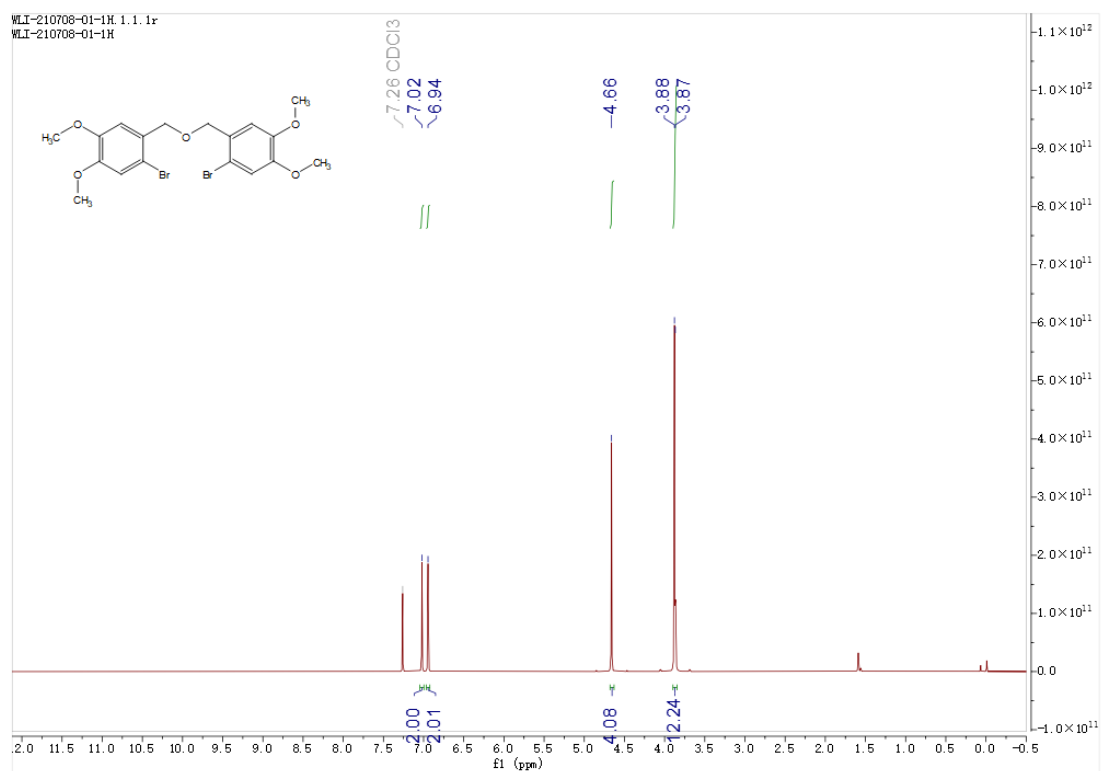

Figure S7.  $^1\text{H}$  NMR spectrum of compound 3b-3 in Chloroform-*d* (400 MHz).

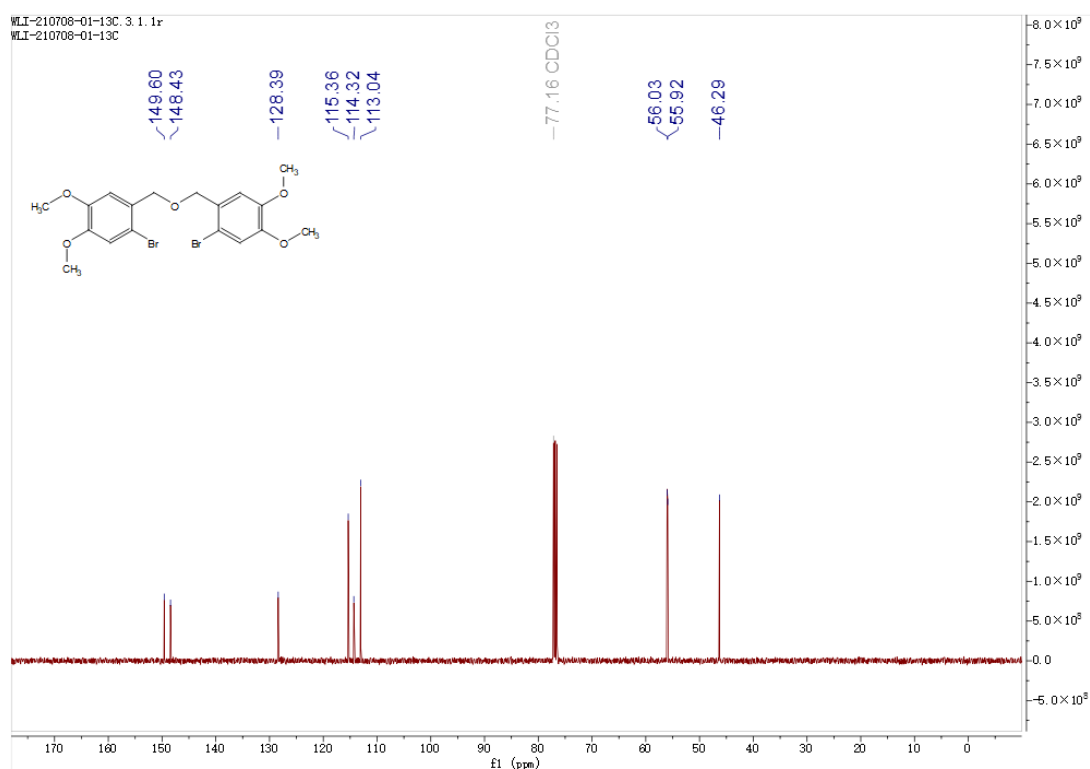

Figure S8. <sup>13</sup>C NMR spectrum of compound 3b-3 in Chloroform-*d* (101 MHz).

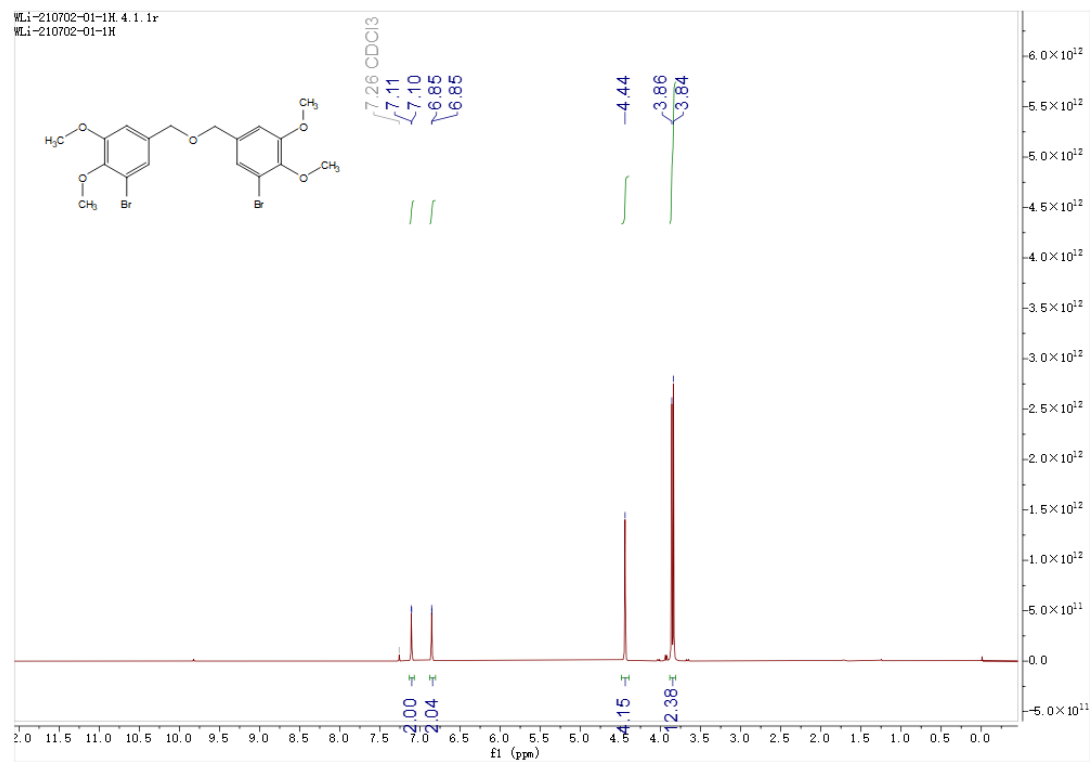

Figure S9. <sup>1</sup>H NMR spectrum of compound 3b-4 in Chloroform-*d* (400 MHz).

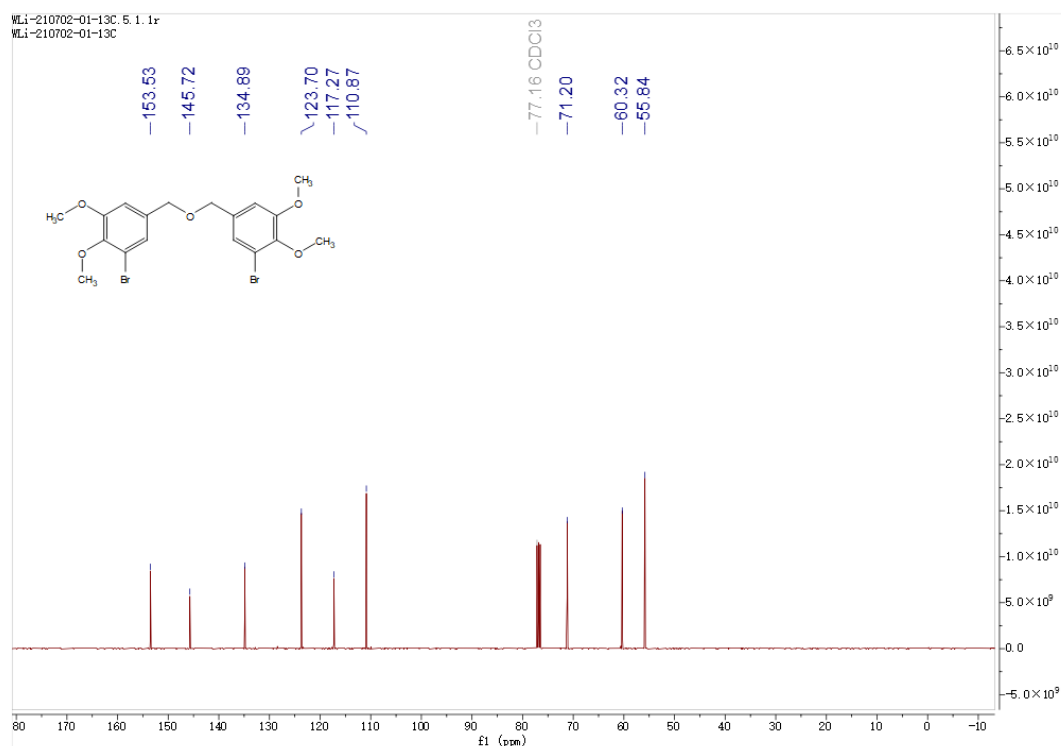

Figure S10. <sup>13</sup>C NMR spectrum of compound **3b-4** in Chloroform-*d* (101 MHz).

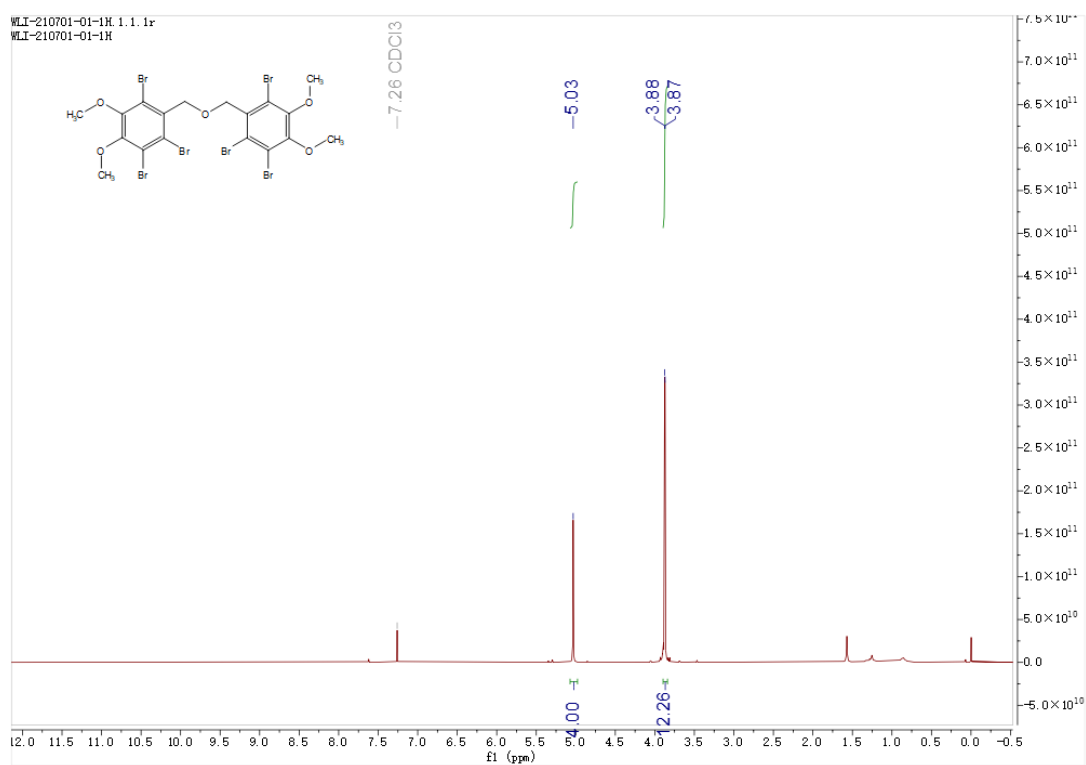

Figure S11. <sup>1</sup>H NMR spectrum of compound **3b-5** in Chloroform-*d* (400 MHz).

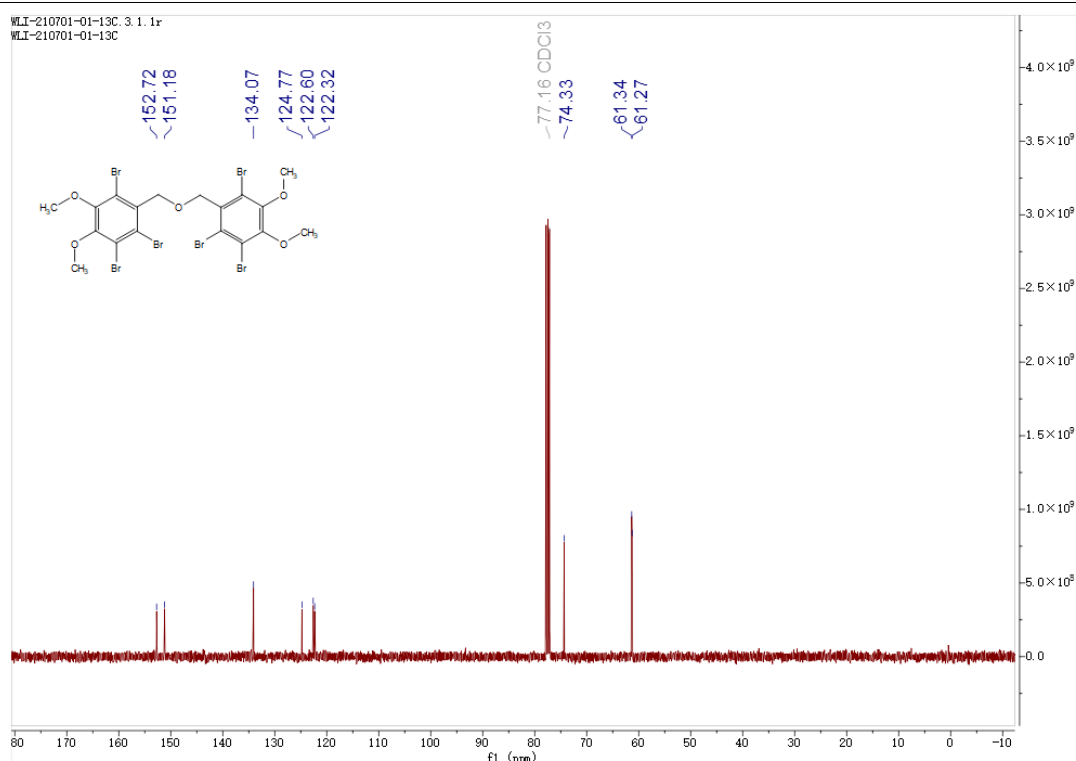

Figure S12.  $^{13}\text{C}$  NMR spectrum of compound 3b-5 in Chloroform-*d* (101 MHz).

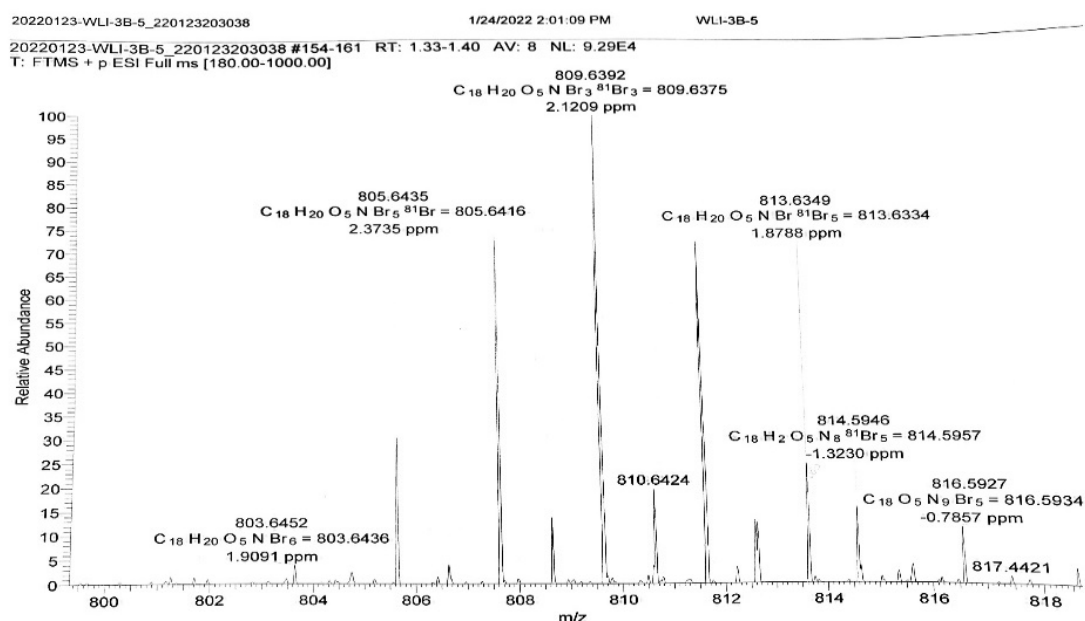

Figure S13. HRMS Spectra of 3b-5.

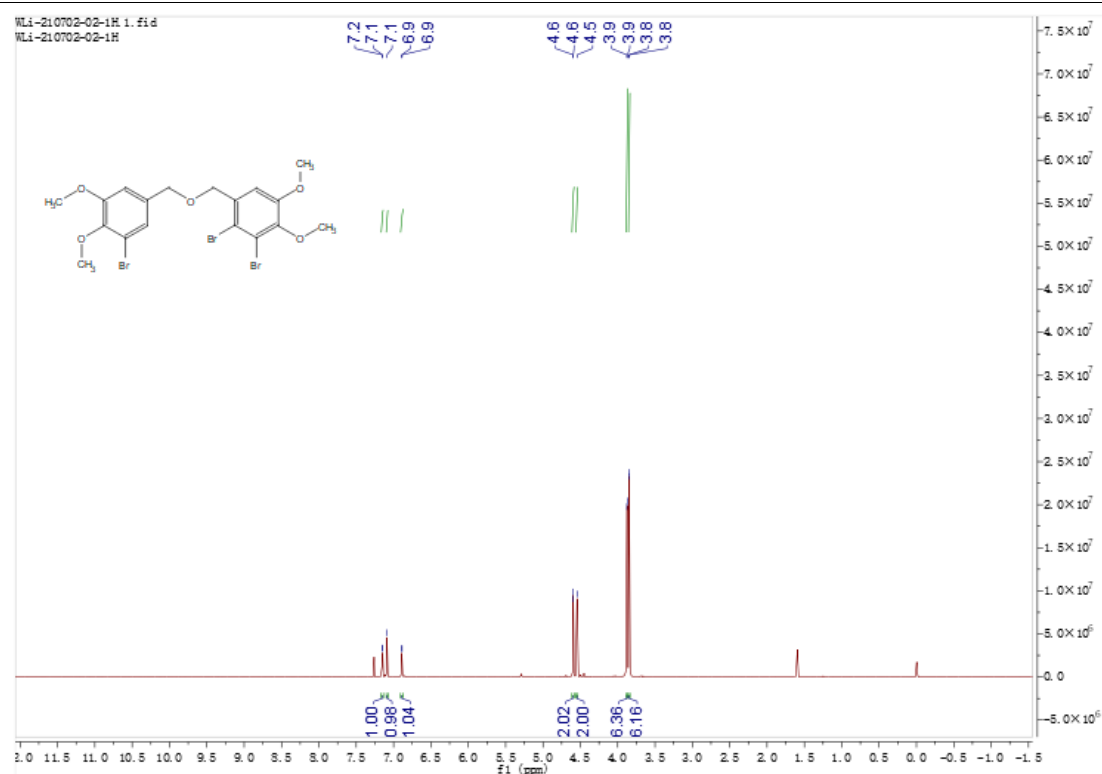

Figure S14. <sup>1</sup>H NMR spectrum of compound **3b-6** in Chloroform-*d* (400 MHz).

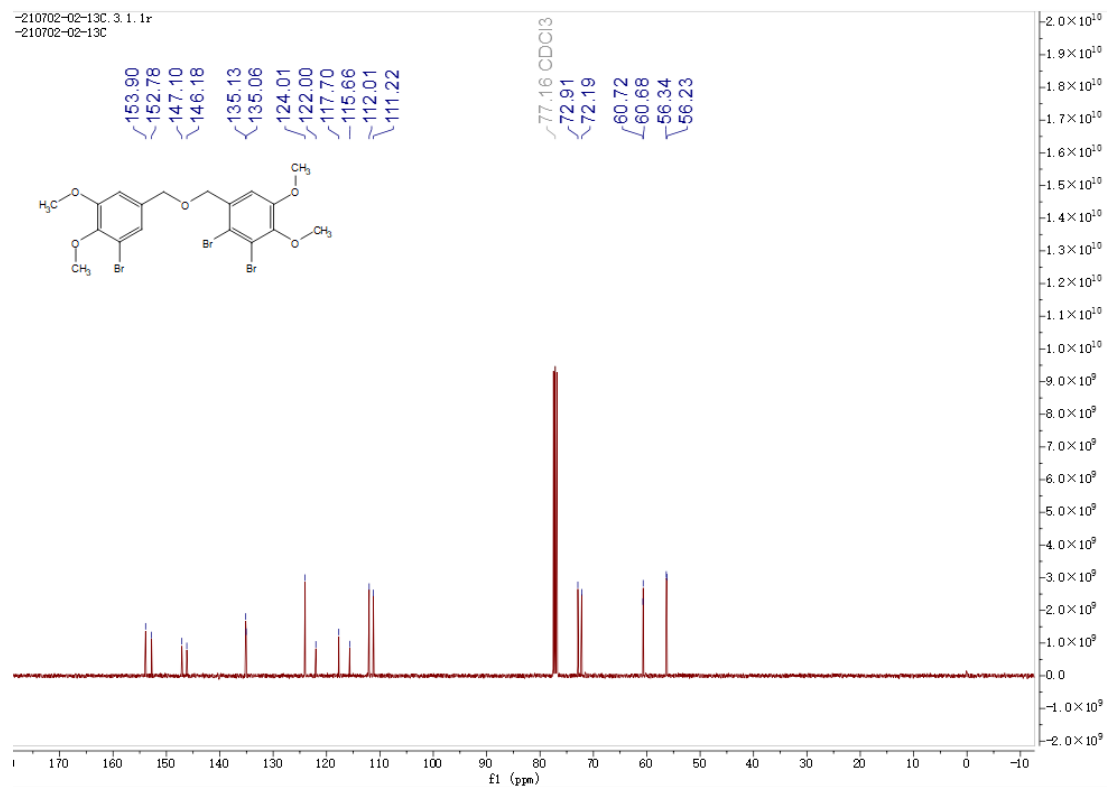

Figure S15. <sup>13</sup>C NMR spectrum of compound **3b-6** in Chloroform-*d* (101 MHz).

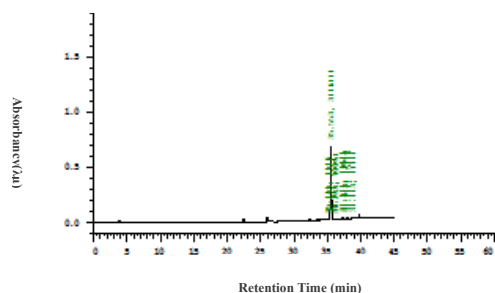

| No. | RT     | Area    | Concentration | BC  |
|-----|--------|---------|---------------|-----|
| 1   | 35.020 | 1186    | 0.037         | BB  |
| 2   | 35.233 | 1344    | 0.042         | BB  |
| 3   | 35.553 | 3086778 | 95.854        | BV  |
| 4   | 35.920 | 5551    | 0.172         | TBB |
| 5   | 36.233 | 12258   | 0.381         | VB  |
| 6   | 37.007 | 17228   | 0.535         | BV  |
| 7   | 37.327 | 49522   | 1.538         | VB  |
| 8   | 37.673 | 14119   | 0.438         | BV  |
| 9   | 38.040 | 15276   | 0.474         | VV  |
| 10  | 38.873 | 17017   | 0.528         | VB  |
|     |        | 3220279 | 100.000       |     |

20220123-WLI-3B-6\_220123203038

1/24/2022 2:07:47 PM

WLI-3B-6

20220123-WLI-3B-6\_220123203038 #51 RT: 0.49 AV: 1 NL: 1.27E6  
T: FTMS + p ESI Full ms [180.00-1000.00]

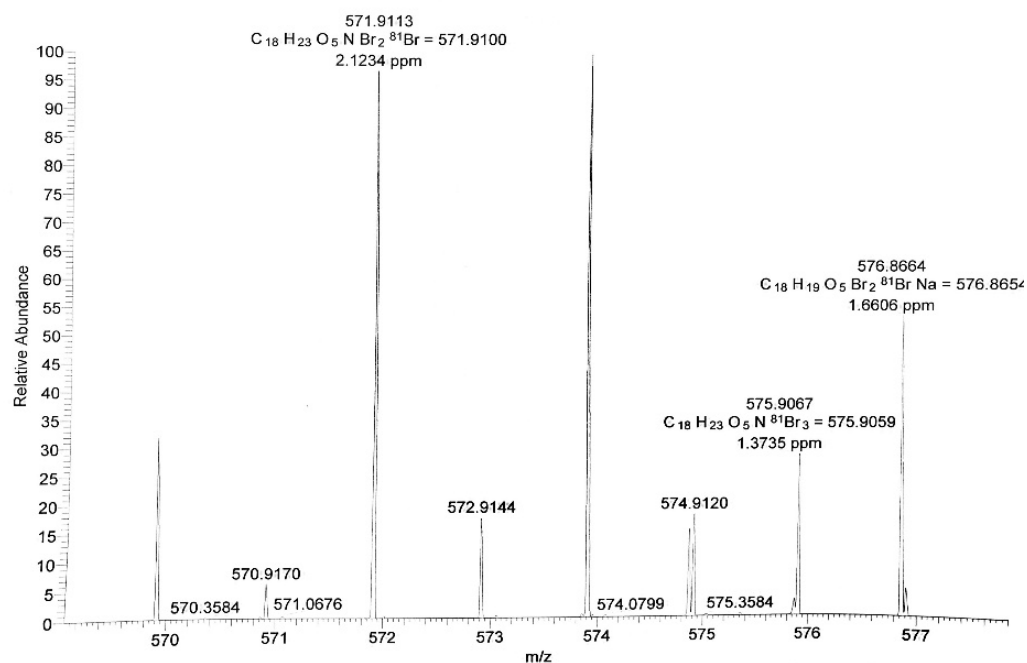

Figure S16. HRMS and HPLC Spectra of 3b-6.

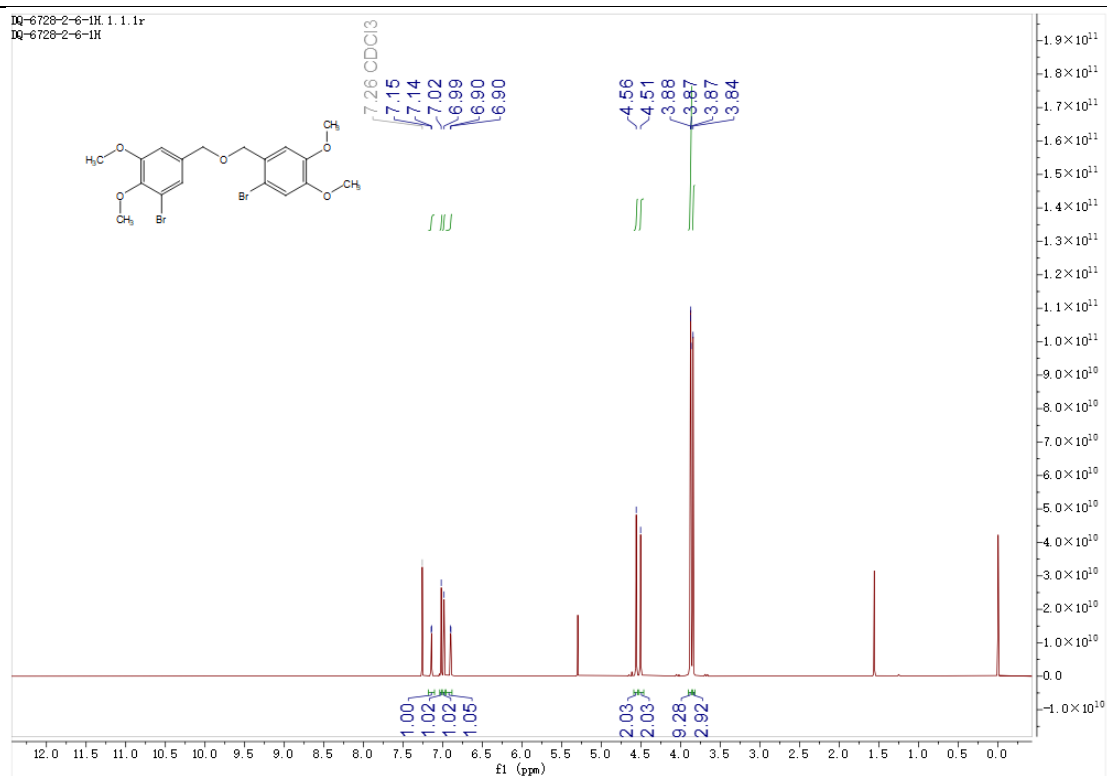

Figure S17. <sup>1</sup>H NMR spectrum of compound **3b-7** in Chloroform-*d* (400 MHz).

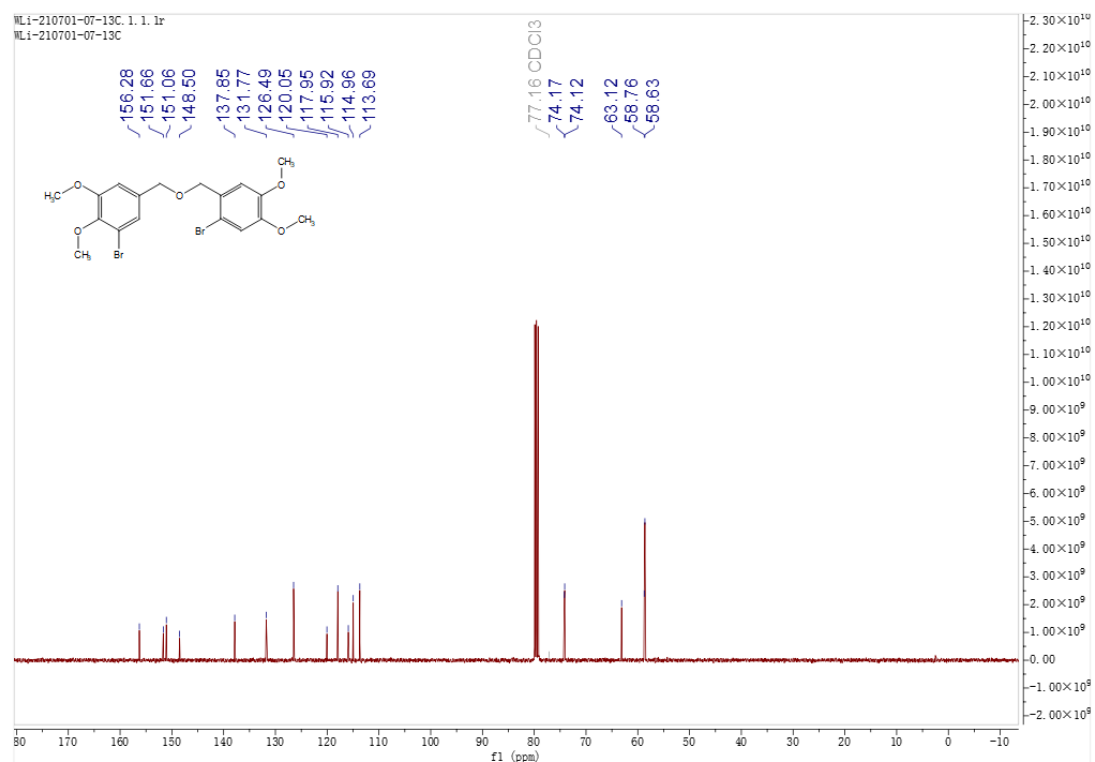

Figure S18. <sup>13</sup>C NMR spectrum of compound **3b-7** in Chloroform-*d* (101 MHz).

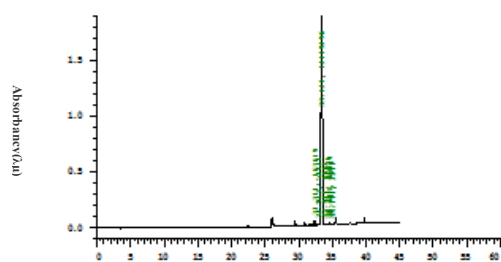

| No. | RT     | Area     | Concentration | BC  |
|-----|--------|----------|---------------|-----|
| 1   | 32.380 | 163649   | 1.249         | BB  |
| 2   | 32.973 | 52727    | 0.402         | BV  |
| 3   | 33.420 | 12789296 | 97.577        | VV  |
| 4   | 33.920 | 6662     | 0.051         | TBB |
| 5   | 34.387 | 21238    | 0.162         | VV  |
| 6   | 34.613 | 63740    | 0.486         | VV  |
| 7   | 34.860 | 7316     | 0.056         | VV  |
| 8   | 35.047 | 2287     | 0.017         | VB  |
|     |        | 13106915 | 100.000       |     |

20220123-WLI-3B-7\_220123203038

1/24/2022 2:12:25 PM

WLI-3B-7

20220123-WLI-3B-7\_220123203038 #63 RT: 0.58 AV: 1 NL: 5.15E6

T: FTMS + p ESI Full ms [180.00-1000.00]

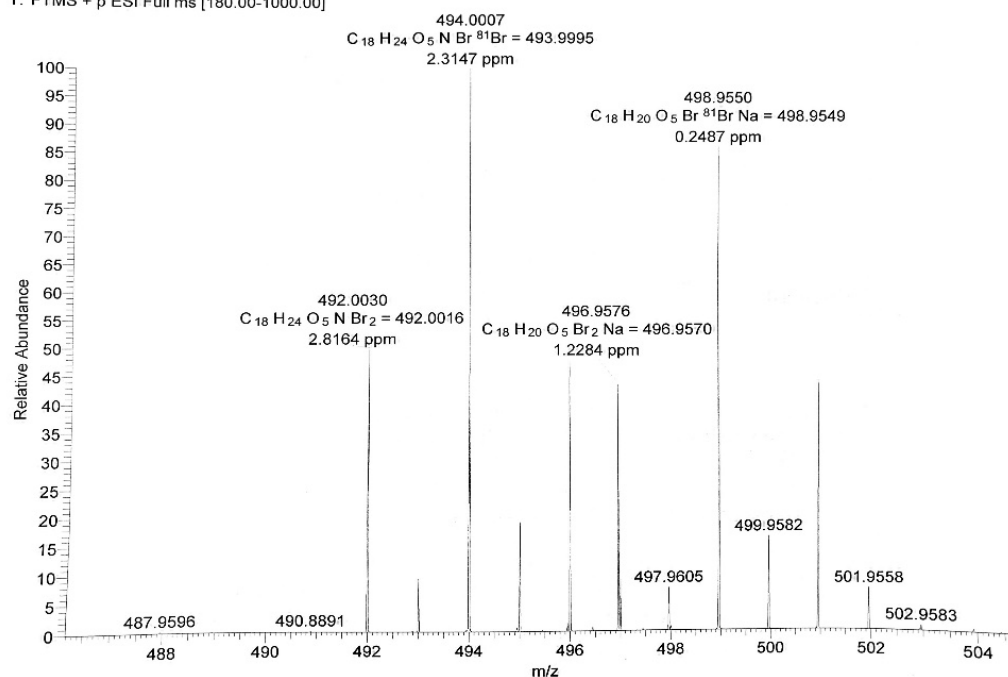

Figure S19. HRMS and HPLC Spectra of 3b-7.

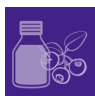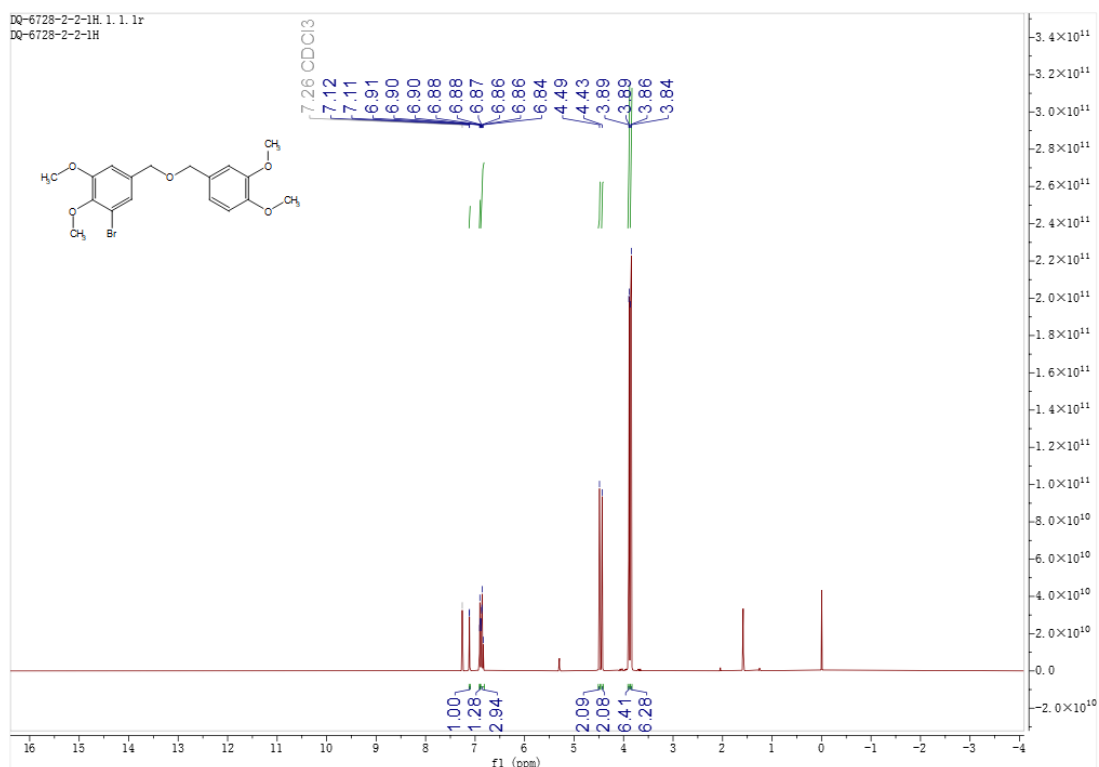

Figure S20.  $^1\text{H}$  NMR spectrum of compound 3b-8 in Chloroform-*d* (400 MHz).

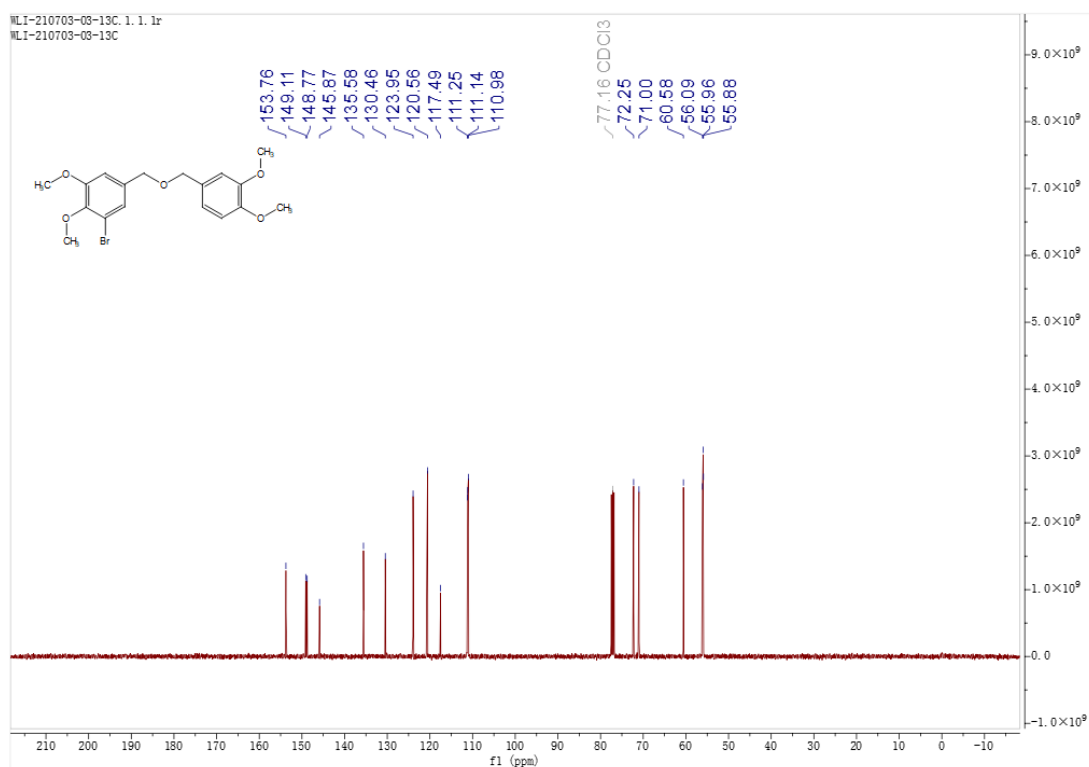

Figure S21.  $^{13}\text{C}$  NMR spectrum of compound 3b-8 in Chloroform-*d* (101 MHz).

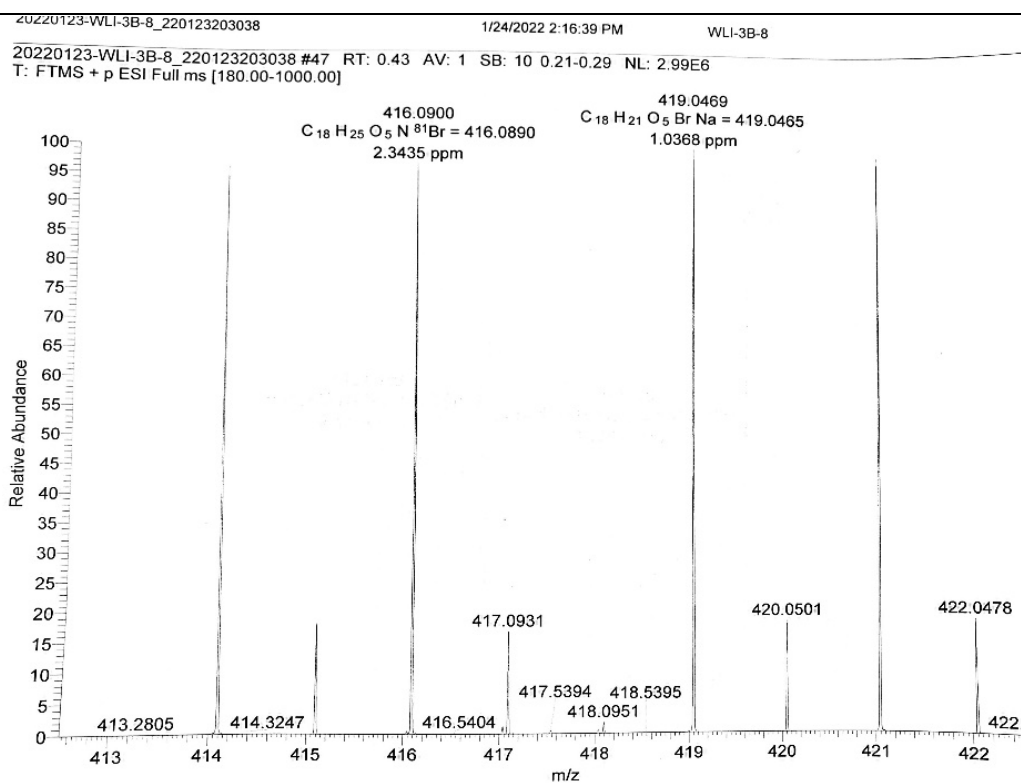

Figure S22. HRMS Spectra of 3b-8.

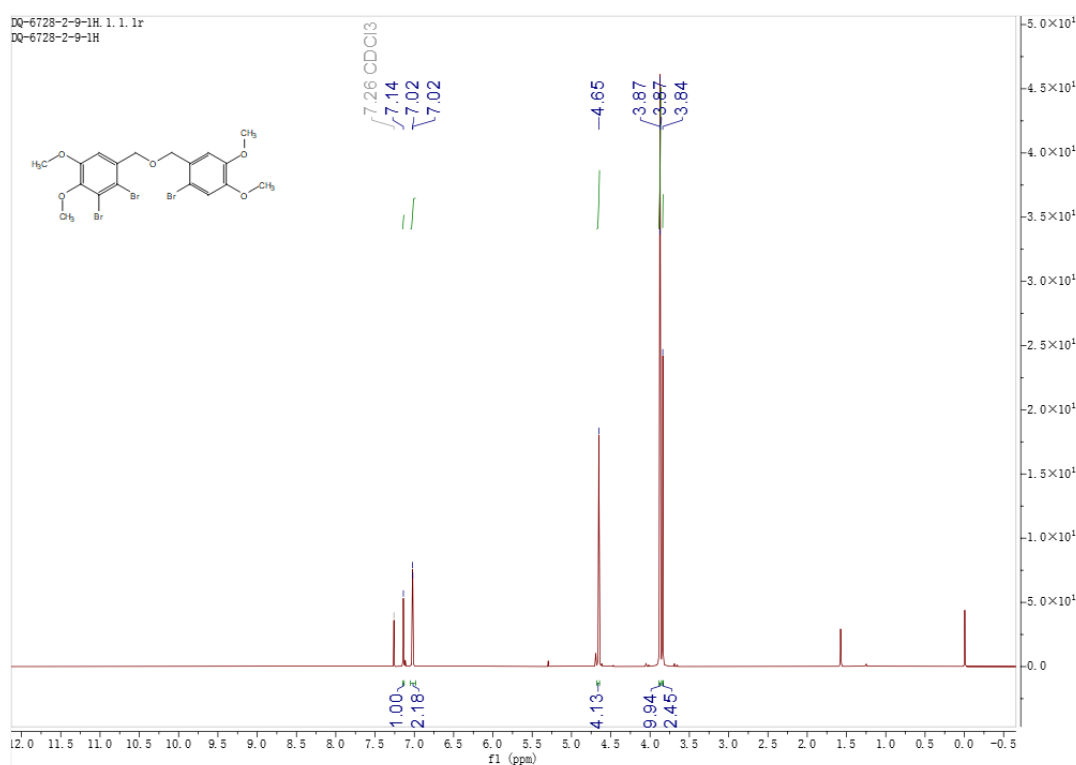Figure S23. <sup>1</sup>H NMR spectrum of compound 3b-9 in Chloroform-*d* (400 MHz).

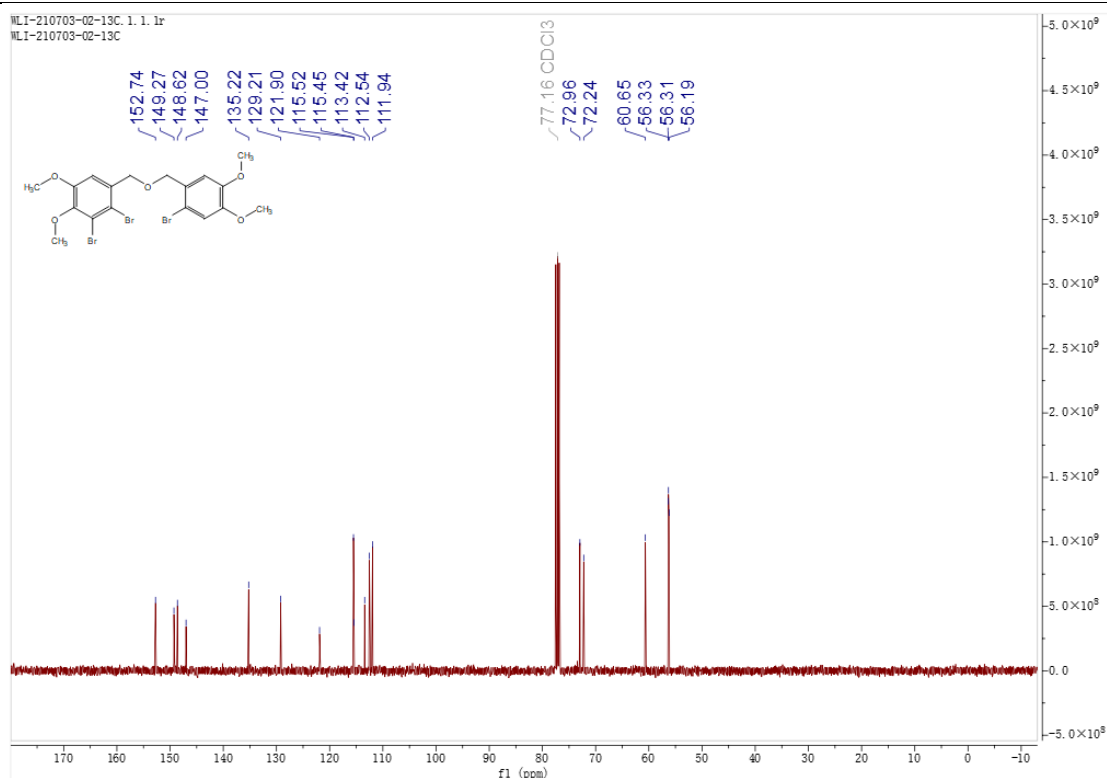

Figure S24. <sup>13</sup>C NMR spectrum of compound **3b-9** in Chloroform-*d* (101 MHz).

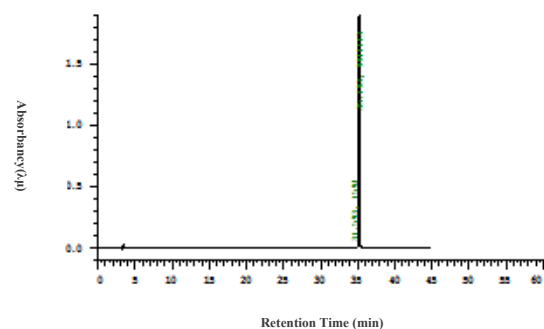

| No. | RT     | Area    | Concentration | BC |
|-----|--------|---------|---------------|----|
| 1   | 34.593 | 7592    | 0.077         | BV |
| 2   | 35.193 | 9900743 | 99.923        | VB |
|     |        | 9908335 | 100.000       |    |



20220123-WLI-3B-9\_220123203038

1/24/2022 2:20:30 PM

WLI-3B-9

20220123-WLI-3B-9\_220123203038 #77 RT: 0.67 AV: 1 SB: 26 0.13-0.35 NL: 2.65E6

T: FTMS + p ESI Full ms [180.00-1000.00]

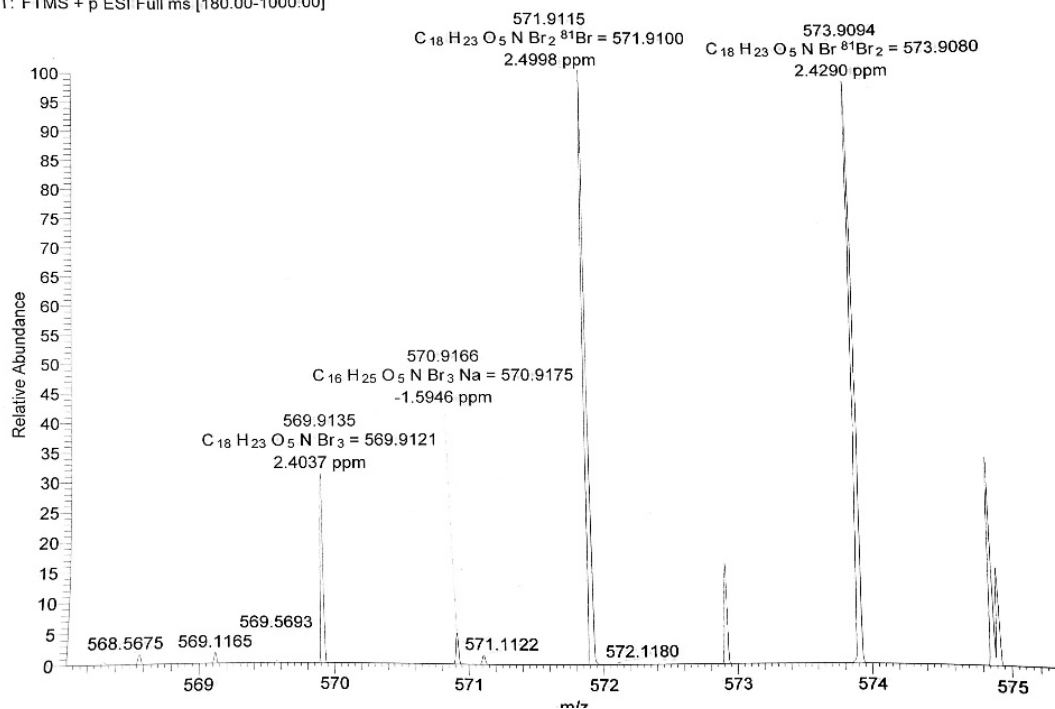

Figure S25. HRMS and HPLC Spectra of 3b-9.

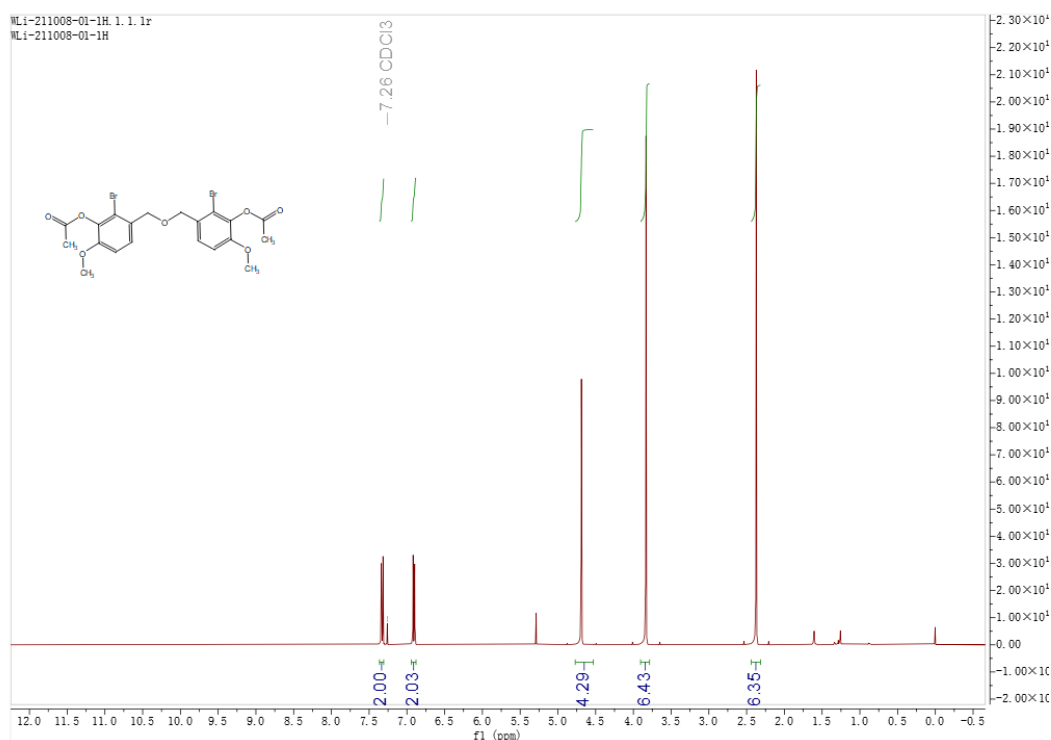Figure S26.  $^1H$  NMR spectrum of compound 4b-1 in Chloroform-*d* (400 MHz).

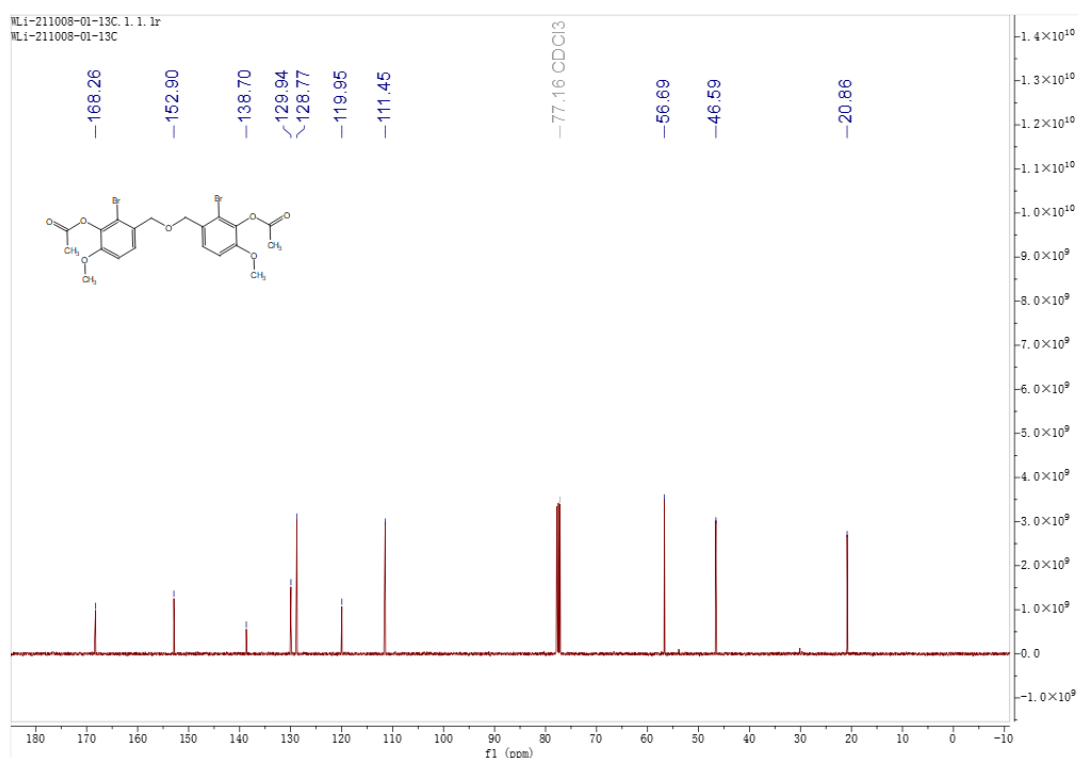

Figure S27. <sup>13</sup>C NMR spectrum of compound 4b-1 in Chloroform-*d* (101 MHz).

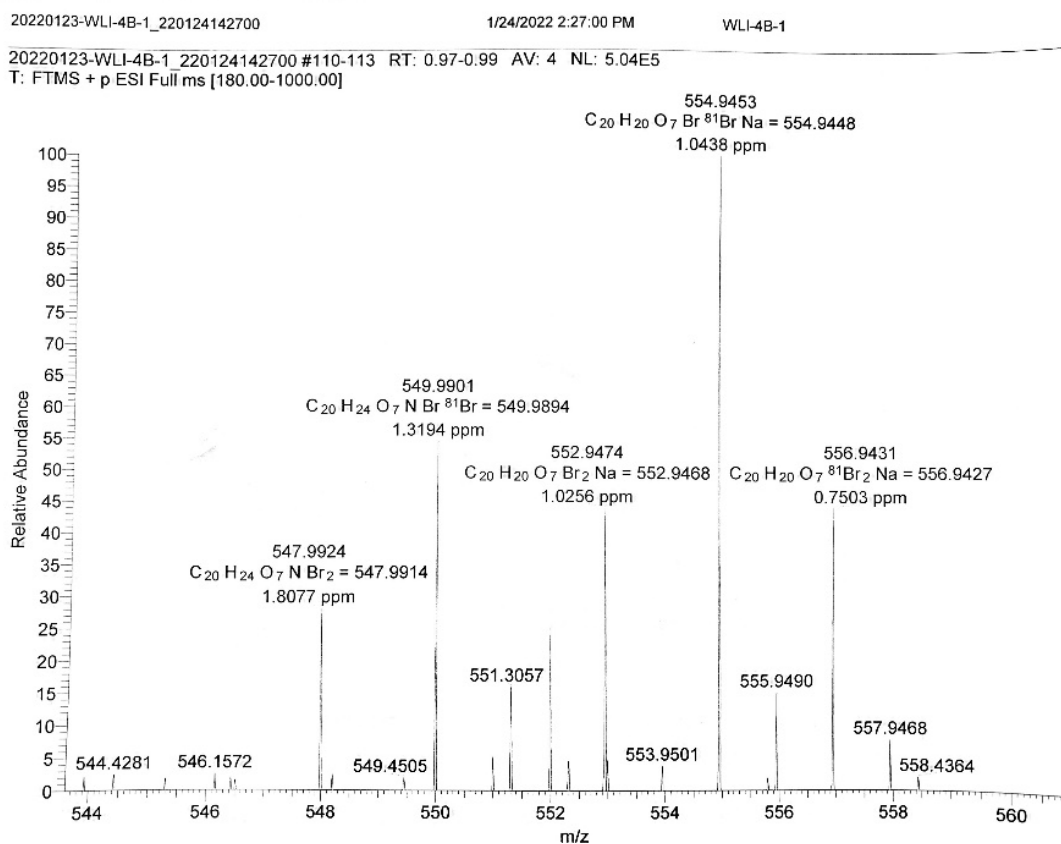

Figure S28. HRMS Spectra of 4b-1.

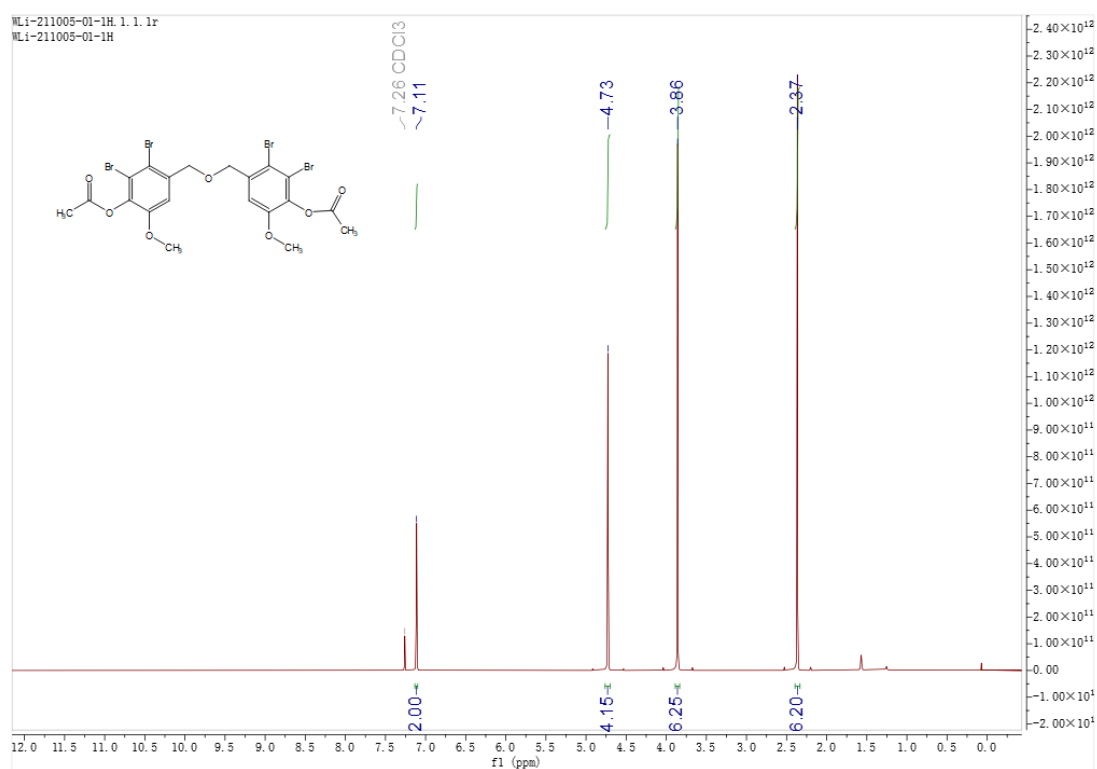

Figure S29.  $^1\text{H}$  NMR spectrum of compound **4b-2** in Chloroform-*d* (400 MHz).

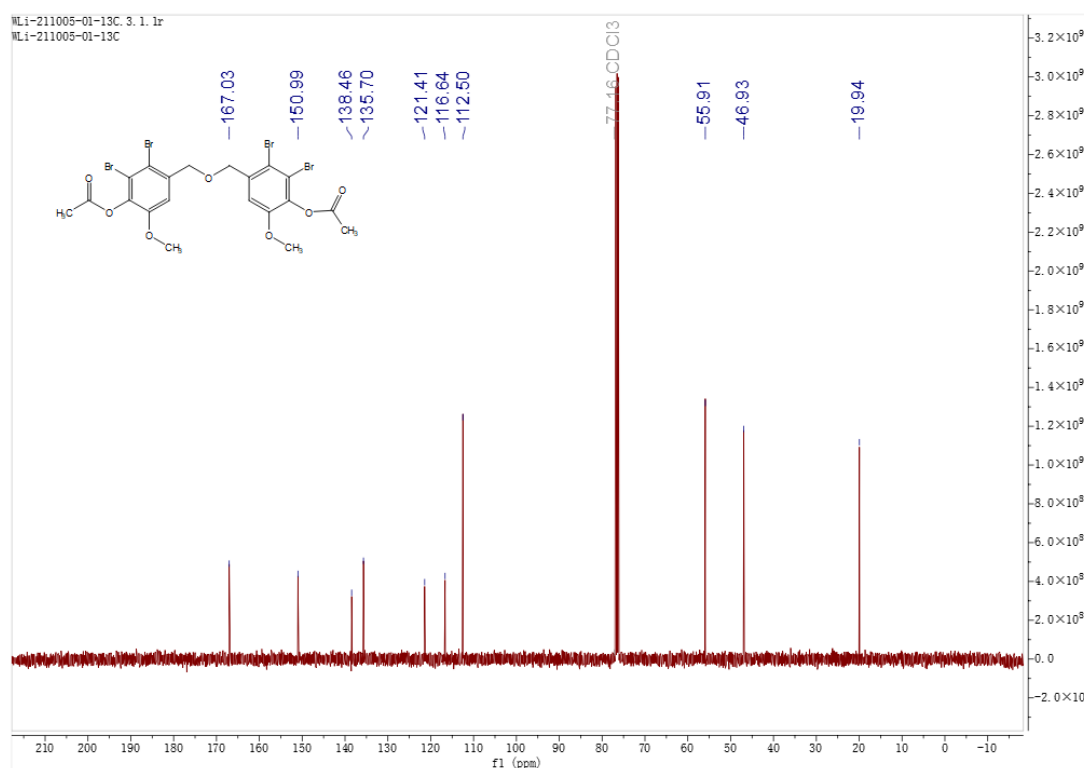

Figure S30.  $^{13}\text{C}$  NMR spectrum of compound **4b-2** in Chloroform-*d* (101 MHz).

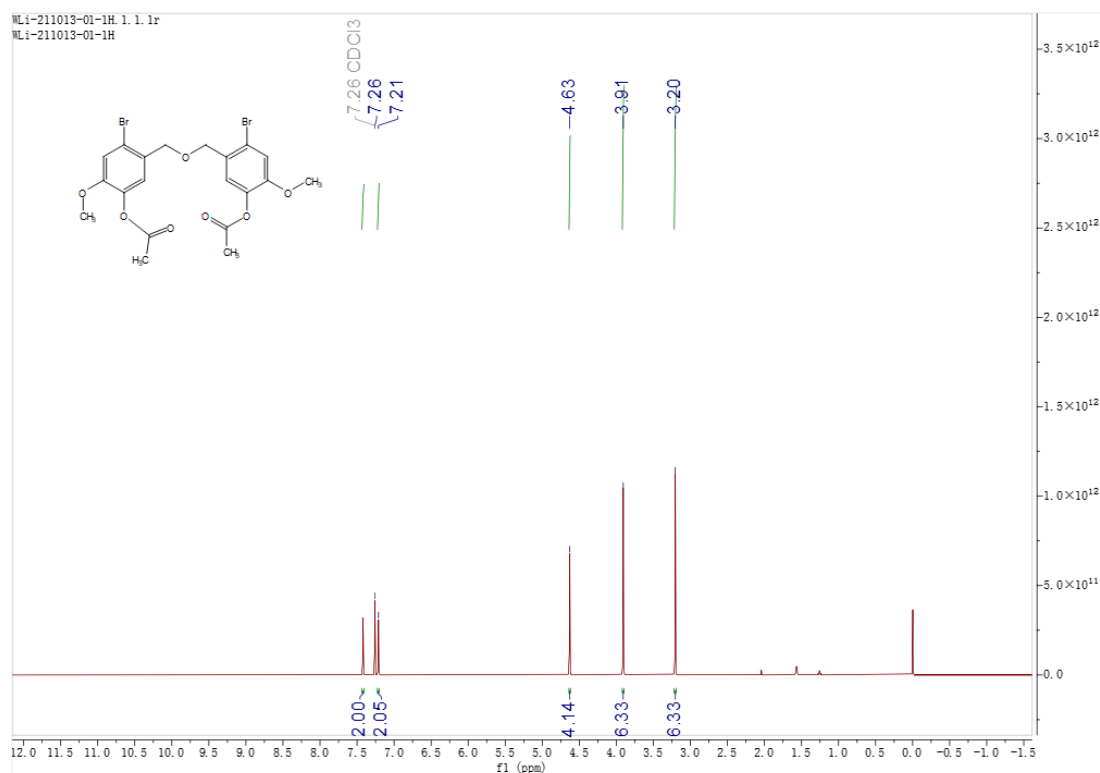

Figure S31.  $^1\text{H}$  NMR spectrum of compound **4b-3** in Chloroform-*d* (400 MHz).

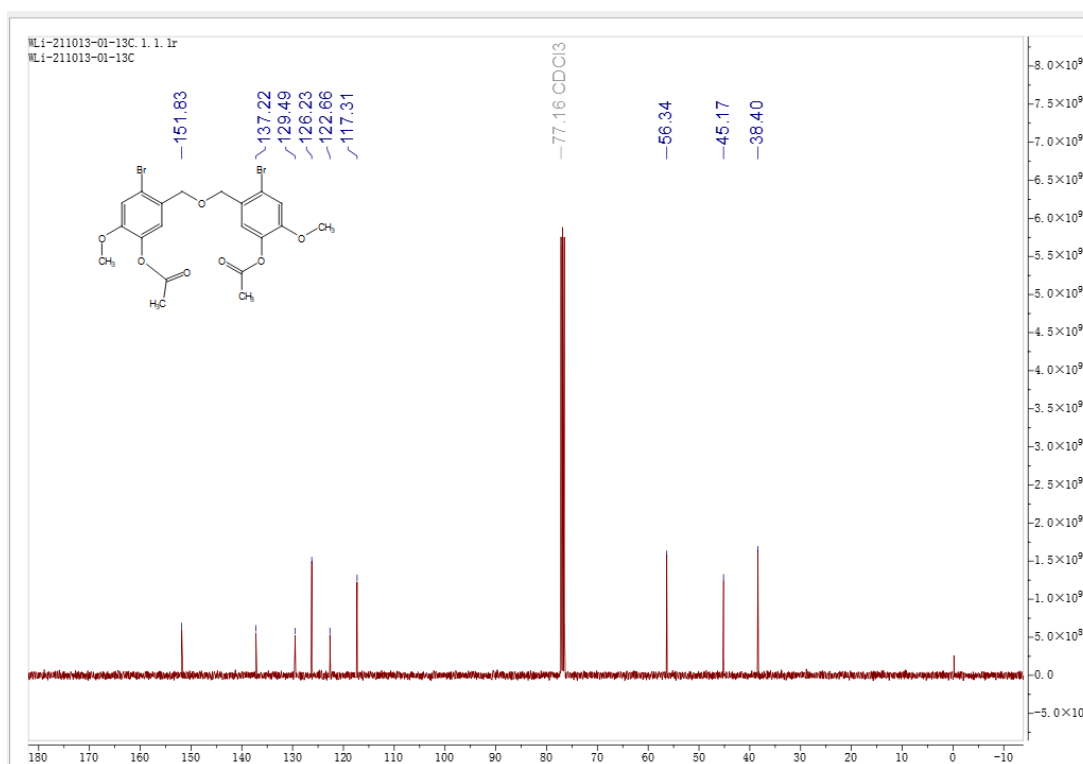

Figure S32.  $^{13}\text{C}$  NMR spectrum of compound **4b-3** in Chloroform-*d* (101 MHz).

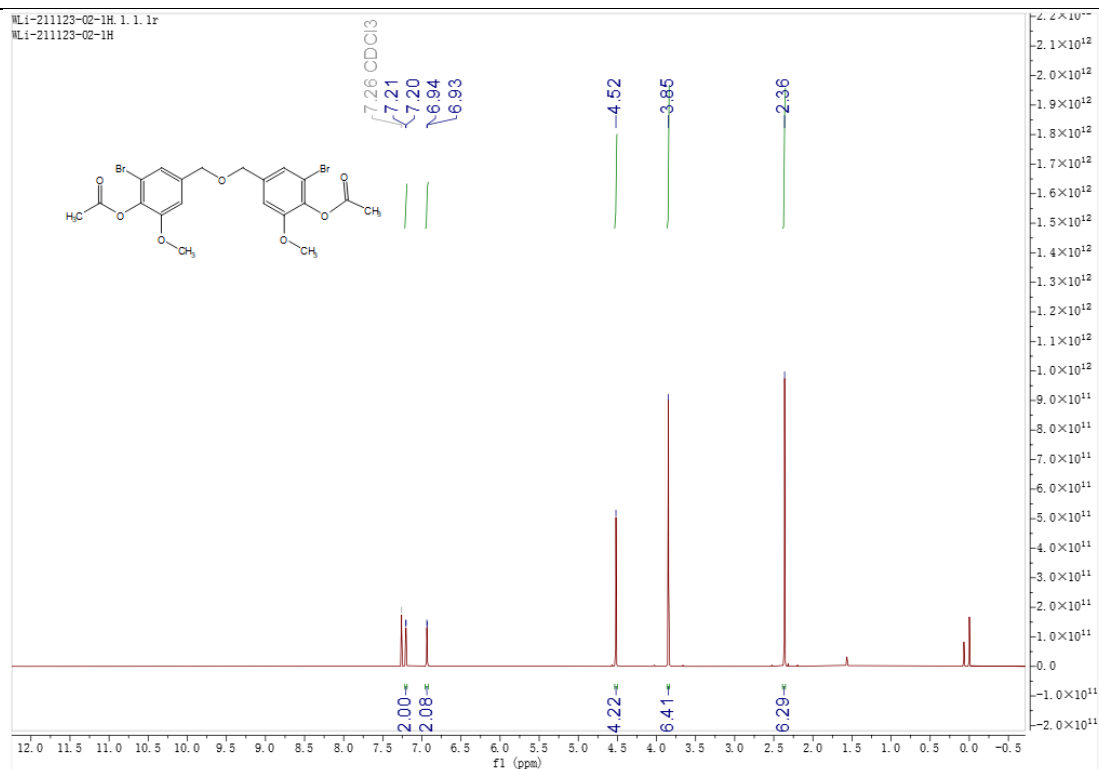

Figure S33. <sup>1</sup>H NMR spectrum of compound **4b-4** in Chloroform-*d* (400 MHz).

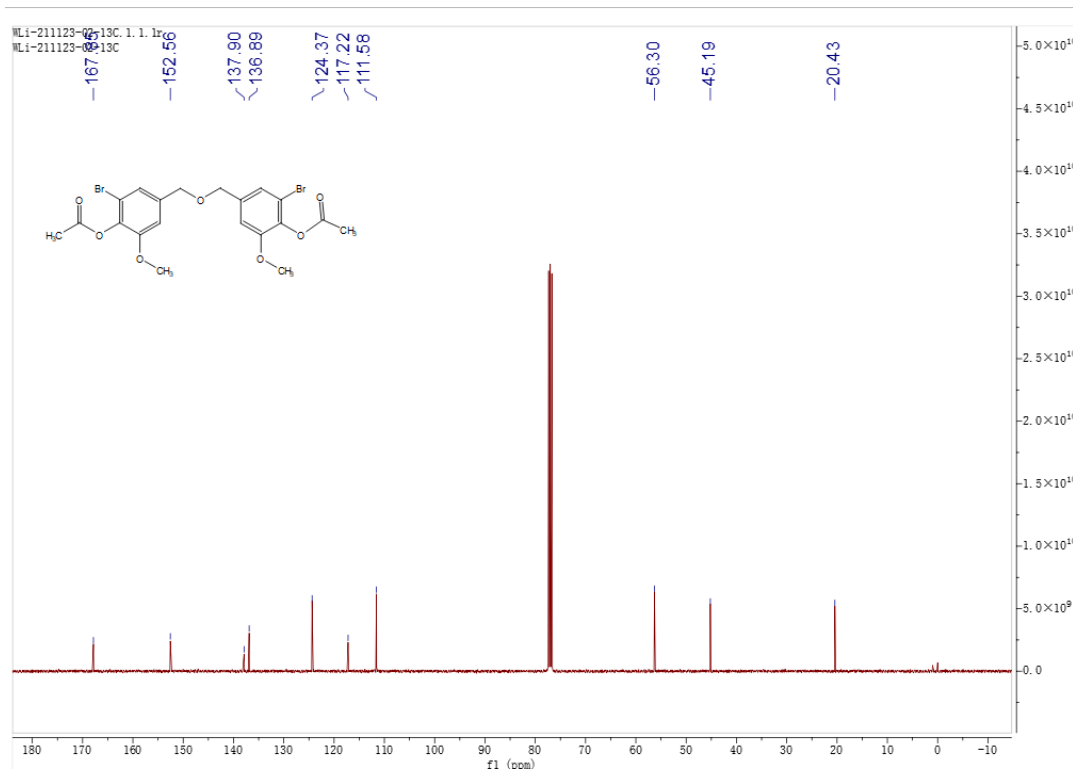

Figure S34. <sup>13</sup>C NMR spectrum of compound **4b-4** in Chloroform-*d* (101 MHz).

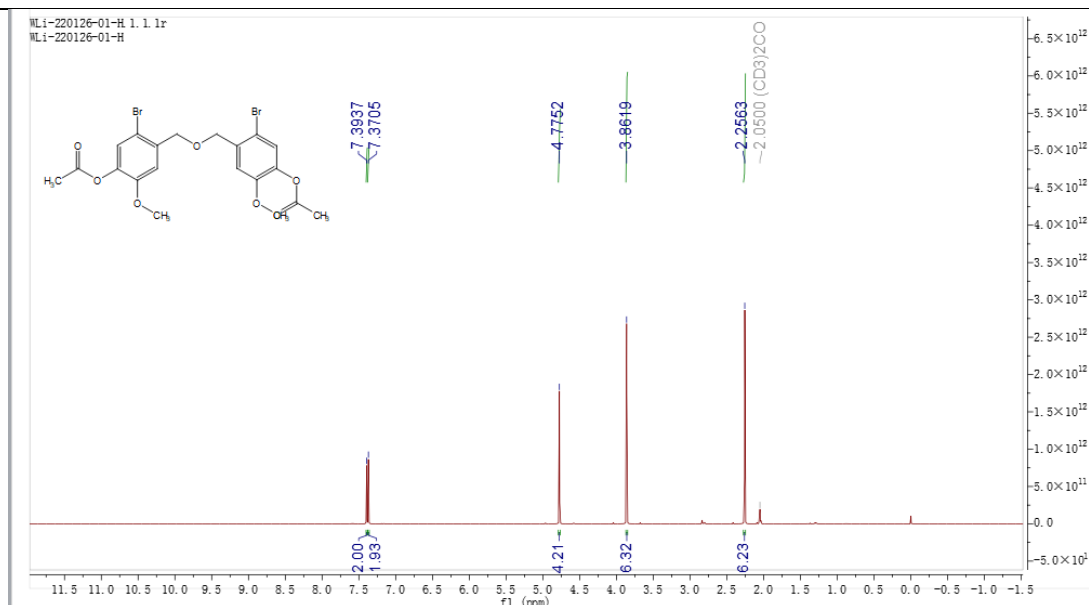

Figure S35. <sup>1</sup>H NMR spectrum of compound **4b-5** in Chloroform-*d* (400 MHz).

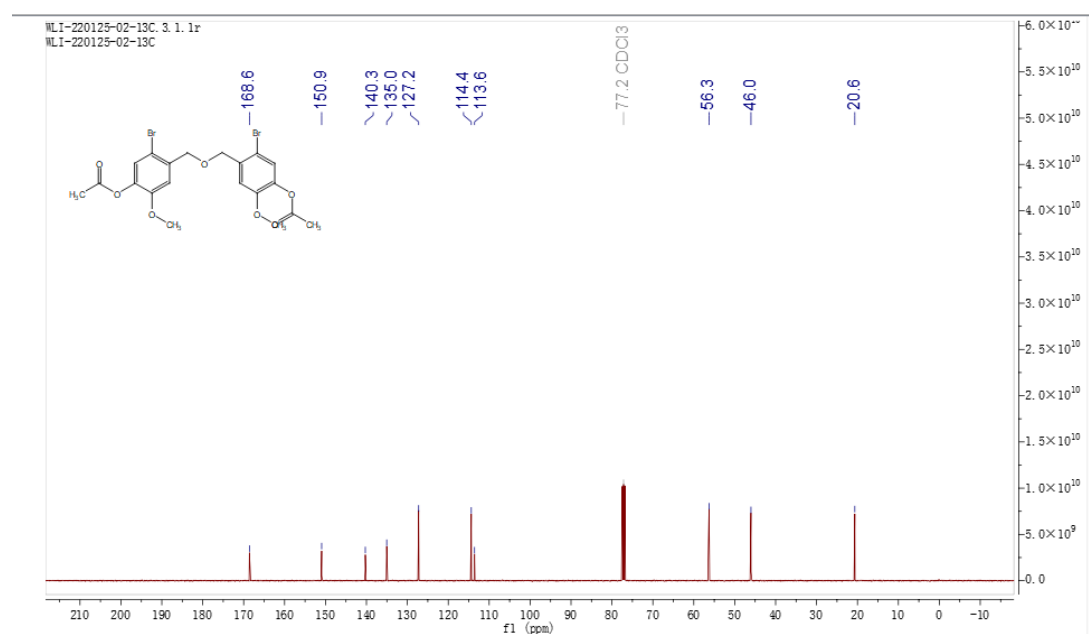

Figure S36. <sup>13</sup>C NMR spectrum of compound **4b-5** in Chloroform-*d* (101 MHz).

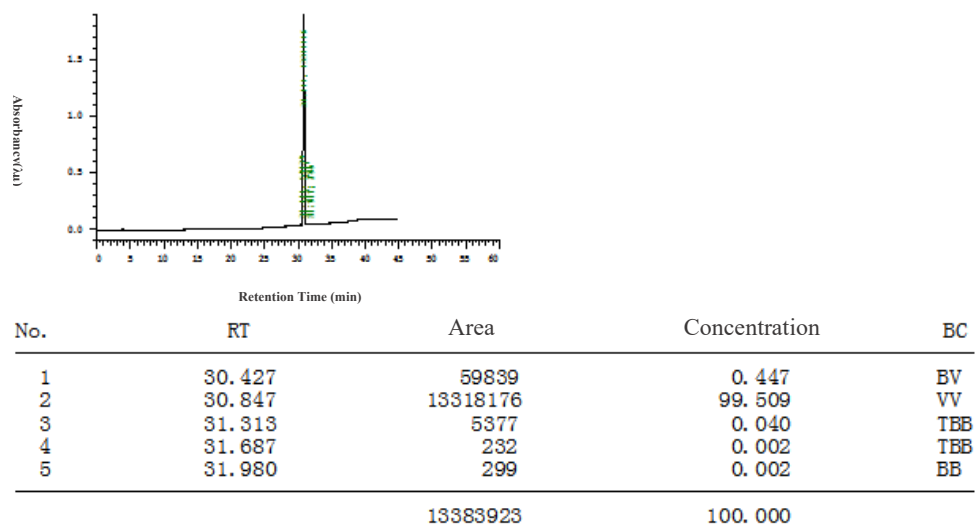

Figure S37. HRMS Spectra of 4b-5.

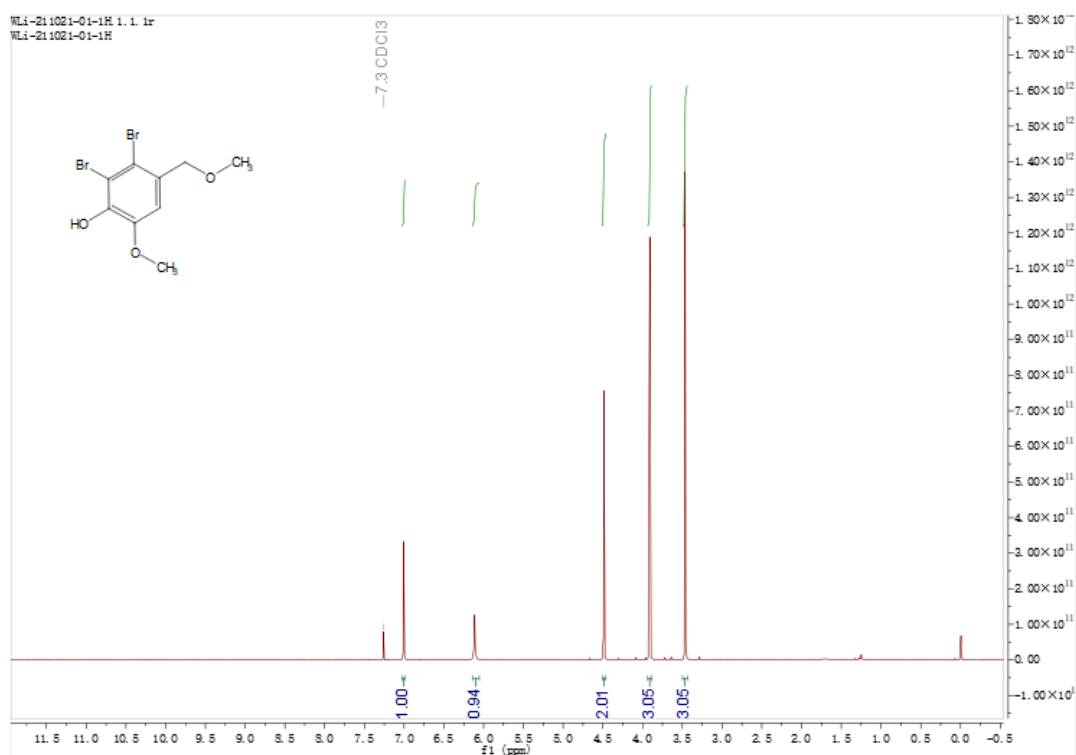Figure S38.  $^1\text{H}$  NMR spectrum of compound 4b-6 in Chloroform-*d* (400 MHz).

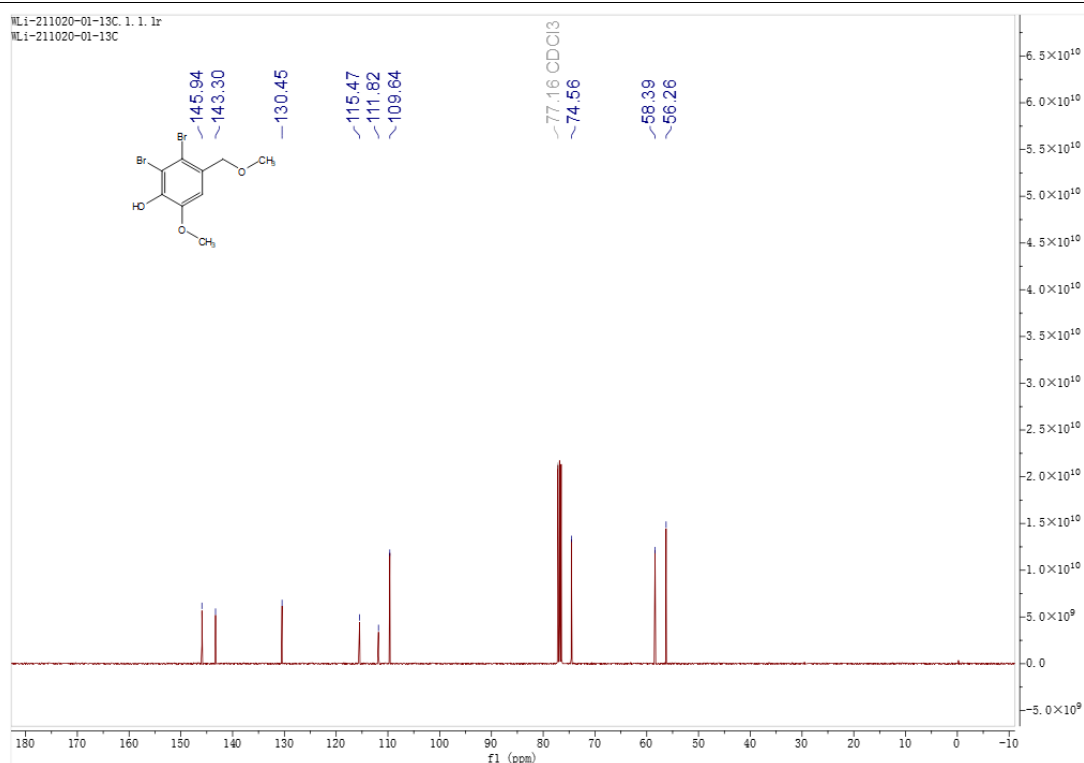

**Figure S39.** <sup>13</sup>C NMR spectrum of compound **4b-6** in Chloroform-*d* (101 MHz).

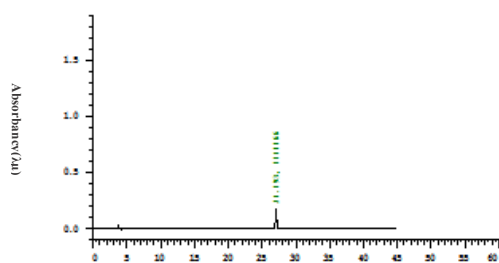

| No. | RT     | Area    | Concentration | BC |
|-----|--------|---------|---------------|----|
| 1   | 27.093 | 1048066 | 100.000       | BB |
|     |        | 1048066 | 100.000       |    |

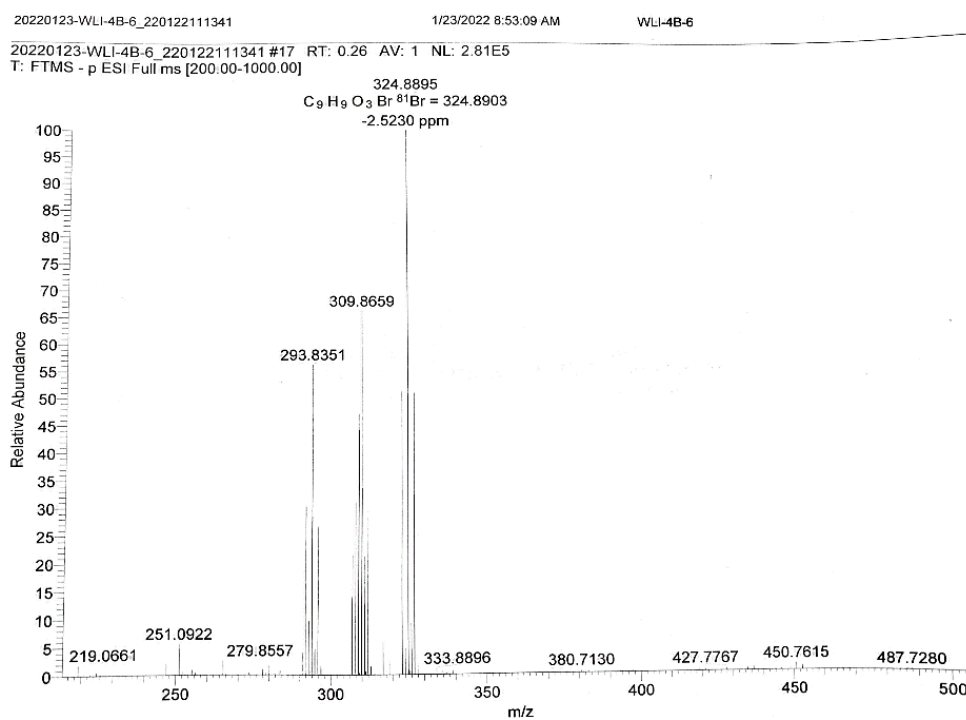

Figure S40. HRMS and HPLC Spectra of **4b-6**.
